# Supplementary material for: Guideline for management of septic arthritis in native joints (SANJO)
Source: Copernicus journal article supplement (doi:10.5194/jbji-8-29-2023), 2023-01-12
Supplement: Supplementary file 4 [file jbji-8-29-2023-supplement.zip]

Archive with 10 entries (10 files):
- Workgroup report 1, diagnosis of SANJO.pdf
- Workgroup report 3, initial surgical treatment of SANJO.pdf
- Workgroup report 2, microbiological methods of SANJO.pdf
- Workgroup report 7, ACL-R infection_shortversion.pdf
- Workgroup report 8, TB SANJO.pdf
- Workgroup report 5, mobilization after SANJO.pdf
- jbji-8-29-2023-supplement-title-page.pdf
- Workgroup report 6, outcome evaluation.pdf
- Workgroup report 4, empirical antibiotic treatment of SANJO.pdf
- Workgroup report 9, Pediatric SANJO.pdf
