# Supplementary material for: Guideline for management of septic arthritis in native joints (SANJO)
Source: Copernicus journal article supplement (doi:10.5194/jbji-8-29-2023), 2023-01-12
Supplement: Supplementary file 4 [file jbji-8-29-2023-supplement.zip › jbji-8-29-2023-supplement-title-page.pdf]

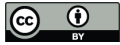

## *Supplement of*

# **Guideline for management of septic arthritis in native joints (SANJO)**

**Christen Ravn et al.**

*Correspondence to:* Christen Ravn ([christen.ravn@rm.dk](mailto:christen.ravn@rm.dk)) and Jeroen Neyt ([jeroen.neyt@uzgent.be](mailto:jeroen.neyt@uzgent.be))

- [jbji-8-29-2023-supplement-title-page.pdf](#)
- [Workgroup report 1, diagnosis of SANJO.pdf](#)
- [Workgroup report 2, microbiological methods of SANJO.pdf](#)
- [Workgroup report 3, initial surgical treatment of SANJO.pdf](#)
- [Workgroup report 4, empirical antibiotic treatment of SANJO.pdf](#)
- [Workgroup report 5, mobilization after SANJO.pdf](#)
- [Workgroup report 6, outcome evaluation.pdf](#)
- [Workgroup report 7, ACL-R infection\\_shortversion.pdf](#)
- [Workgroup report 8, TB SANJO.pdf](#)
- [Workgroup report 9, Pediatric SANJO.pdf](#)
- [jbji-8-29-2023-supplement-title-page.pdf](#)

The copyright of individual parts of the supplement might differ from the article licence.
